# Supplementary material for: Inorganic red perovskite quantum dot integrated blue chip: a promising candidate for high color-rendering in w-LEDs
Source: Royal Society of Chemistry journal article supplement (doi:10.1039/c6ra16040a), 2016-01-01
Supplement: c6ra16040a1.pdf [file c6ra16040a1.pdf]

## Electronic Supplementary Information (ESI†)

### **Inorganic red perovskite quantum dots integrated blue chip: a promising candidate for high color-rendering in w-LED†**

Bheeshma Pratap Singh,<sup>a‡</sup> Shin-Ying Lin,<sup>a‡</sup> Hung-Chia Wang,<sup>a</sup> An-Cih Tang,<sup>a</sup> Hung-Chun Tong,<sup>b</sup> Ching-Yi Chen,<sup>b</sup> Yu-Chun Lee,<sup>b</sup> Tzong-Liang Tsai<sup>b</sup> and Ru-Shi Liu<sup>ac\*</sup>

<sup>a</sup>Department of Chemistry, National Taiwan University, Taipei-Taiwan-10617

<sup>b</sup>Lextar Electronics corporation, Hsinchu, 300, Taiwan

<sup>c</sup>Department of Mechanical Engineering and Graduate Institute of Technology, National Taipei University of Technology, Taipei, 10608-Taiwan

Email: [rsliu@ntu.edu.tw](mailto:rsliu@ntu.edu.tw)

## **Experimental Details**

### **Materials**

Cesium carbonate ( $\text{Cs}_2\text{CO}_3$ , Aldrich, 99.9%), lead bromide ( $\text{PbBr}_2$ , ABCR, 98%), lead iodide ( $\text{PbI}_2$ , ABCR, 99.999%), 1-octadecene (ODE, Aldrich, 90%), oleic acid (OA, Sigma-Aldrich, 90%) oleylamine (OAm, Acros Organics, 80%–90%), YAG: $\text{Ce}^{3+}$  yellow (YAG04, Intematix) and silicon resin (Dow Corning OE-6631 A and B) were used during the studies.

### **Synthesis of inorganic red perovskite $\text{CsPb}(\text{Br}_{0.3}\text{I}_{0.7})_3$ (R-PQDs) via hot injection method**

#### **Preparation of Cs oleate precursor**

In a typical synthesis of the Cs oleate precursor, 0.407 g of  $\text{Cs}_2\text{CO}_3$ , 1.25 mL of OA, and 20 mL of ODE were mixed in a three-necked bottle with 50 mL capacity. Moisture and oxygen contents involved in the solutions were removed under vacuum condition at 120 °C for 1 h. Thereafter, the temperature of the above mixture solution was increased to 150 °C for 20 minutes under  $\text{N}_2$  environment until  $\text{Cs}_2\text{CO}_3$  was fully dissolved in oleic acid. The obtained Cs-

oleate precursor solution was then stored in a refrigerator and used to synthesize perovskite quantum dots.

### **Synthesis of R-PQDs**

In a typical synthesis of the CsPb(Br<sub>0.3</sub>I<sub>0.7</sub>)<sub>3</sub> R-PQDs (Cs, 20 mL of ODE, 0.808 g of PbBr<sub>2</sub>, 0.2408 g PbI<sub>2</sub>, 2.6 mL of OA, and 2.6 mL of OAm were mixed in a 50 mL three-necked bottle. Water and oxygen contents in the mixture solutions were removed under vacuum condition at 120 °C for 30 min. Thereafter temperature of the solution was increased to 190 °C in a N<sub>2</sub> environment and maintained the temperature for the 10 min approximately. Further, 1.6 mL of Cs-oleate precursor, which was pre-heated at 120 °C, was injected into the prepared solution. After 5 s, the three-necked bottle was placed in an ice bath and cooled to room temperature. The crude solution was collected via centrifugation at 9000 rpm at 10 °C and finally the precipitate was dispersed in a hexane solution. Moreover, other compositions were prepared by following the same procedure as stated above with different constituents of PbBr<sub>2</sub> and PbI<sub>2</sub>.

### **Fabrication of inorganic R-PQD integrated YAG: Ce phosphor-based White LEDs**

In the light emitting diode (LED) packaging procedure, 0.25 mL of R-PQDs (10 mg/mL) in hexane solution was mixed with 0.5 g of silicon resin B. The resulting mixture was then heated to 40 °C for 1 h to remove the solvent. A half equal of silicon resin A (0.25 g) and red PQDs (0.025 g) were mixed with the previously prepared red QD silicon resin B mixture. The mixture was dropped onto a blue chip and thermally cured for 2 h at 100 °C in an oven after the bubbles were removed. The electroluminescent properties of the fabricated devices were determined by using an integrating sphere spectroradiometer system (LHS-1000, Everfine) with an analyzer system (Everfine Photo-EINFO Co., Ltd.).

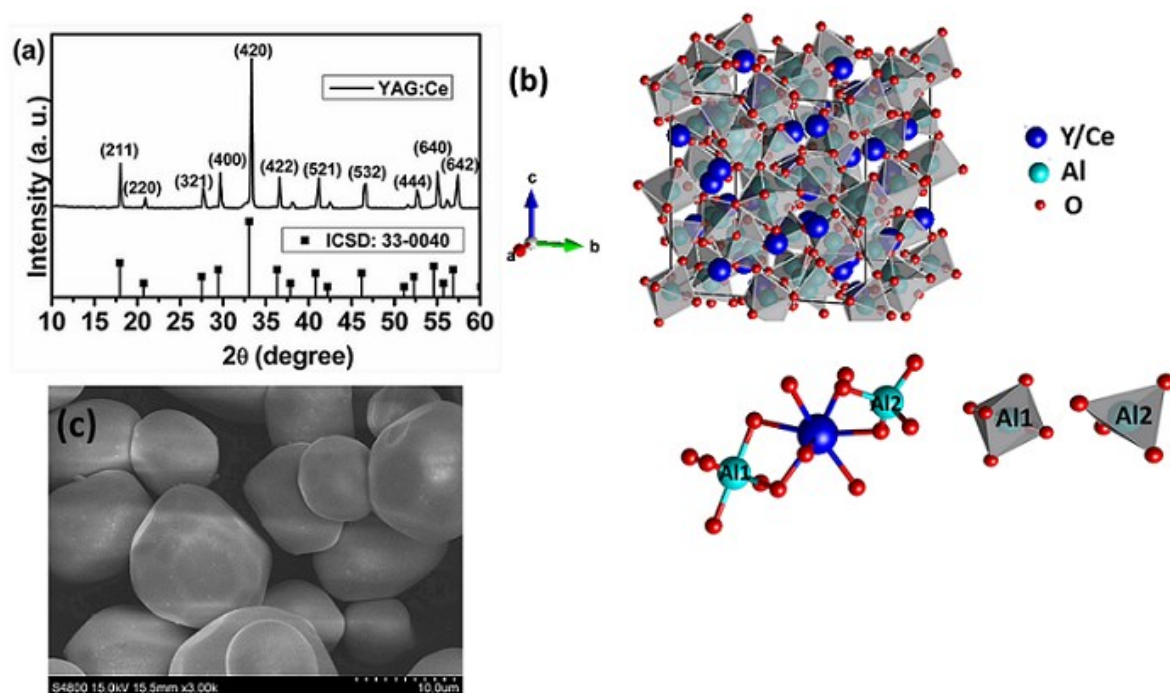

**Fig. S1** (a) XRD patterns of commercial YAG:Ce, (b) polyhedral representation of structural units in YAG:Ce and (c) SEM micrograph of YAG:Ce.

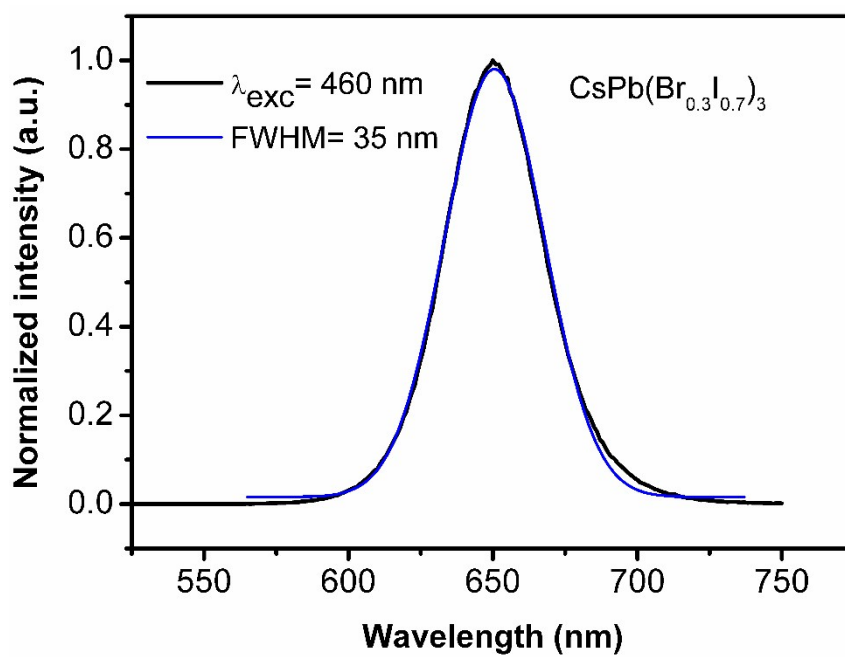

**Fig. S2** Typical Gauss peak fitting and corresponding FWHM of CsPb(Br<sub>0.3</sub>I<sub>0.7</sub>)<sub>3</sub> R-PQDs (650 nm peak max.) under 460 nm excitation wavelength.

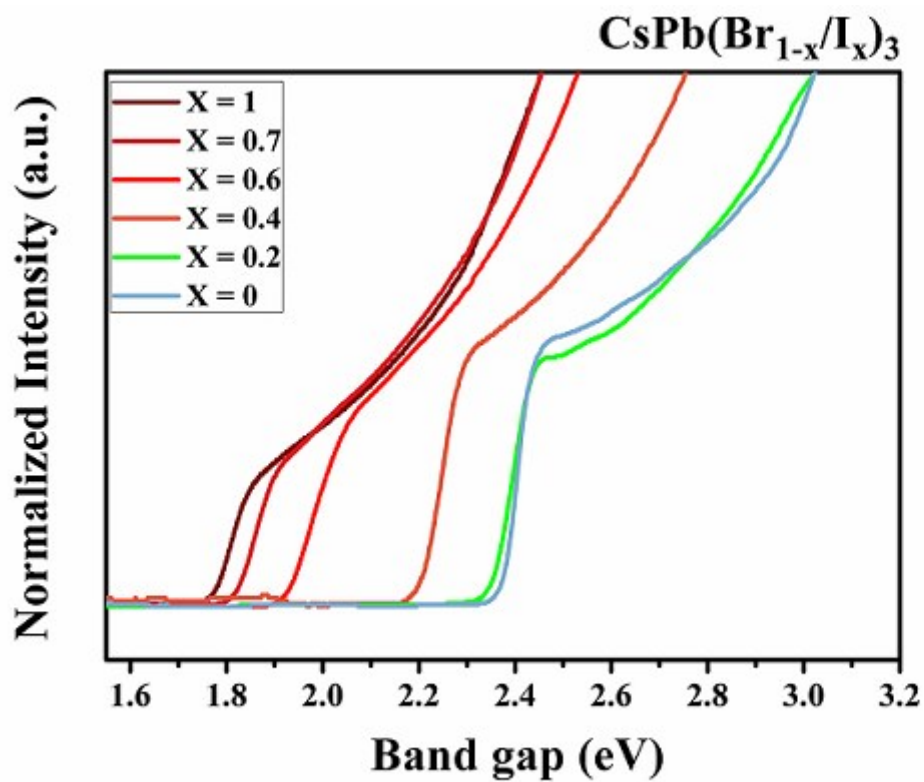

**Fig. S3** optical band gap estimation of CsPb(Br<sub>1-x</sub>I<sub>x</sub>)<sub>3</sub>, x=0, 0.2, 0.4, 0.6, 0.7 and 1, using the Wood-Tauc model.

**Table S1:** composition, emission peak maxima and their corresponding FWHM

| CsPb(Br <sub>1-x</sub> I <sub>x</sub> ) <sub>3</sub> |                 |           |
|------------------------------------------------------|-----------------|-----------|
| X                                                    | Wavelength (nm) | FWHM (nm) |
| 0.5                                                  | 578             | 35        |
| 0.6                                                  | 625             | 35        |
| 0.7                                                  | 650             | 35        |
| 1                                                    | 690             | 36        |

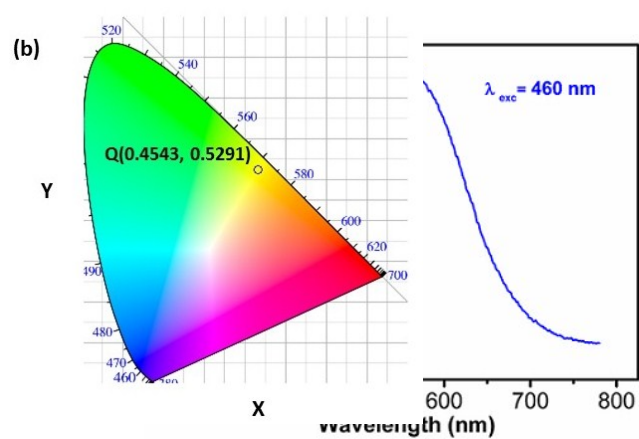

**Fig. S4** (a) Excitation and emission spectra and (b) CIE coordinates of YAG:Ce phosphor.
